# Supplementary material
Source: PubMed Central journal article supplement (PMC3039211)

Supporting documents: Table A. Basal and stimulated levels of HPA axis hormones in IBS

| Study                          | Diagnosis (n)                                      | Stimulus | Source          | Time of collection                                                         | ACTH levels (IBS vs. Controls) | Cortisol levels (IBS vs. Controls) |
|--------------------------------|----------------------------------------------------|----------|-----------------|----------------------------------------------------------------------------|--------------------------------|------------------------------------|
| <b>Basal levels</b>            |                                                    |          |                 |                                                                            |                                |                                    |
| Heitkemper 1996 <sup>82</sup>  | IBS (24)<br>IBS non-patients (24)<br>Controls (25) | NA       | urine           | am and pm                                                                  | -                              | Trend for ↑                        |
| Patacchioli 2001 <sup>63</sup> | IBS (55)<br>Controls (28)                          | NA       | saliva          | am and pm                                                                  | -                              | ↑                                  |
| Bohmelt 2005 <sup>64</sup>     | IBS/NUD (30)<br>Controls (24)                      | NA       | saliva          | 8am, 11am, 3pm, 8pm                                                        | -                              | ↓                                  |
| Burr NGM 2009 <sup>65</sup>    | IBS (30)<br>Controls (31)                          | NA       | blood           | q20min, 8pm to awake                                                       | -                              | ↑<br>in IBS-C                      |
| Chang 2009 <sup>60</sup>       | IBS (24)<br>IBS+FM (16)<br>Controls (25)           | NA       | blood           | q10min x 24 hrs                                                            | ↓                              | ↑                                  |
| <b>Hormone challenge</b>       |                                                    |          |                 |                                                                            |                                |                                    |
| Bohmelt 2005 <sup>64</sup>     | IBS/NUD (30)<br>Controls (24)                      | CRF      | blood<br>saliva | Baseline and 20, 30, 45, 60, 90 and 120 min after CRF                      | ↓                              | ↓                                  |
| Dinan 2006 <sup>62</sup>       | IBS (21)<br>Controls (21)                          | CRF      | blood           | Baseline and immediately and 15, 30, 45, 60, 90, and 120 minutes after CRF | ↑                              | ↑                                  |
| Fukudo 1998 <sup>38</sup>      | IBS (10)<br>Controls (10)                          | CRF      | blood           | Standard collection                                                        | ↑                              | No difference                      |

| <b>Meal and/or mental stressor</b> |                                                              |                                           |        |                                                                                                     |                                                                         |                                                                      |
|------------------------------------|--------------------------------------------------------------|-------------------------------------------|--------|-----------------------------------------------------------------------------------------------------|-------------------------------------------------------------------------|----------------------------------------------------------------------|
| Elsenbruch 2001 <sup>66</sup>      | IBS (24)<br>Controls (20)                                    | Standard meal                             | saliva | Baseline x2,<br>immediately and 30<br>and 60 min after<br>meal                                      | -                                                                       | ↑ IBS-D/A<br>post-meal vs.<br>baseline but no<br>group<br>difference |
| Elsenbruch 2001 <sup>32</sup>      | IBS (24)<br>Controls (20)                                    | Standard meal+<br>Modified Stroop<br>test | saliva | Baseline x 2,<br>immediately after<br>meal, after<br>stressor/rest period,<br>after recovery period | -                                                                       | No difference                                                        |
| Walter 2006 <sup>83</sup>          | IBS (27)<br>Functional<br>constipation (13)<br>Controls (18) | Liquid meal +<br>rectal distensions       | saliva | 8am, 1pm, 3pm,<br>10pm on day<br>without stressor and<br>day of stressor                            | -                                                                       | No difference                                                        |
| Elsenbruch 2004 <sup>69</sup>      | IBS (15)<br>Controls (15)                                    | Liquid nutrient<br>load                   | blood  | Baseline,<br>immediately and 15,<br>45, 75, 105 min after<br>meal                                   | -                                                                       | No difference                                                        |
| Elsenbruch 2006 <sup>59</sup>      | IBS (17)<br>Controls (12)                                    | Public speaking                           | blood  | Baseline and<br>immediately and 45<br>min after stressor                                            | No difference                                                           | No difference                                                        |
| Posserud 2004 <sup>33</sup>        | IBS (18)<br>Controls (22)                                    | Mental stress +<br>rectal distensions     | blood  | After distension only<br>and after<br>stress+distension                                             | ↑ CRF and<br>ACTH in IBS<br>and not controls;<br>no group<br>difference | No difference                                                        |
| <b>Physical stressor</b>           |                                                              |                                           |        |                                                                                                     |                                                                         |                                                                      |
| Vidlock 2009 <sup>61</sup>         | IBS (44)<br>Controls (39)                                    | Sigmoidoscopy                             | saliva | Baseline and<br>immediately and 10,<br>20, 30, 45, and 60<br>min after stressor                     | -                                                                       | No difference                                                        |

|                               |                                   |                                           |                 |                                                                      |               |               |
|-------------------------------|-----------------------------------|-------------------------------------------|-----------------|----------------------------------------------------------------------|---------------|---------------|
| FitzGerald 2009 <sup>68</sup> | IBS-D (F, 13)<br>Controls (F, 13) | Lumbar<br>puncture                        | blood<br>saliva |                                                                      | ↓             | ↓             |
| Zhou 2010 <sup>67</sup>       | IBS-D (78)<br>Controls (57)       | Ischemic arm test                         | blood           | Baseline,<br>immediately after<br>stressor, 60 min after<br>stressor | ↑             | ↑             |
| Zhou 2010 <sup>67</sup>       | IBS-D (78)<br>Controls (57)       | Thermal,<br>mechanical,<br>& cold preesor | blood           | Baseline,<br>immediately after<br>stressor, 60 min after<br>stressor | No difference | No difference |

Abbreviations: FM = Fibromyalgia; NUD = non-ulcer dyspepsia

ACCEPTED MANUSCRIPT

## Supporting documents

### **Figure A. Role of stress in development and modulation of irritable bowel syndrome (IBS)**

**symptoms.**<sup>5</sup> Different types of stressors may play a role in the permanent biasing of stress responsiveness, the transient activation of the stress response, the increased vulnerability of developing IBS, and the persistence of symptoms.

**Figure B. The stress system.**<sup>85</sup> The HPA axis has been studied extensively in the stress response. Neurons in the medial parvocellular region of the PVN of the hypothalamus release CRH and arginine vasopressin (AVP). This then triggers the secretion of ACTH from the pituitary gland, subsequently leading to the production of glucocorticoids by the adrenal cortex. The stress-induced responsiveness of the HPA axis is in part modulated by the ability of glucocorticoids to regulate ACTH and CRF release by binding to two corticosteroid receptors, the glucocorticoid receptor (GR) and the mineralocorticoid receptor (MR) which are part of the feedback loop. Under normal physiologic conditions, after the HPA axis is activated and the stressor is perceived to have subsided, these feedback loops are triggered at various levels of the system in order to shut down the HPA axis and return to a set homeostatic point. However, the amygdala has a feed forward mechanism to activate the HPA axis during stress to deal with the challenge.

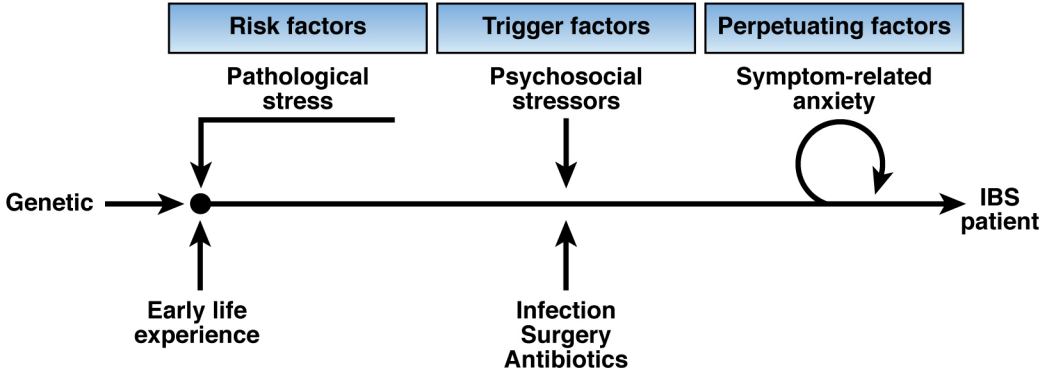

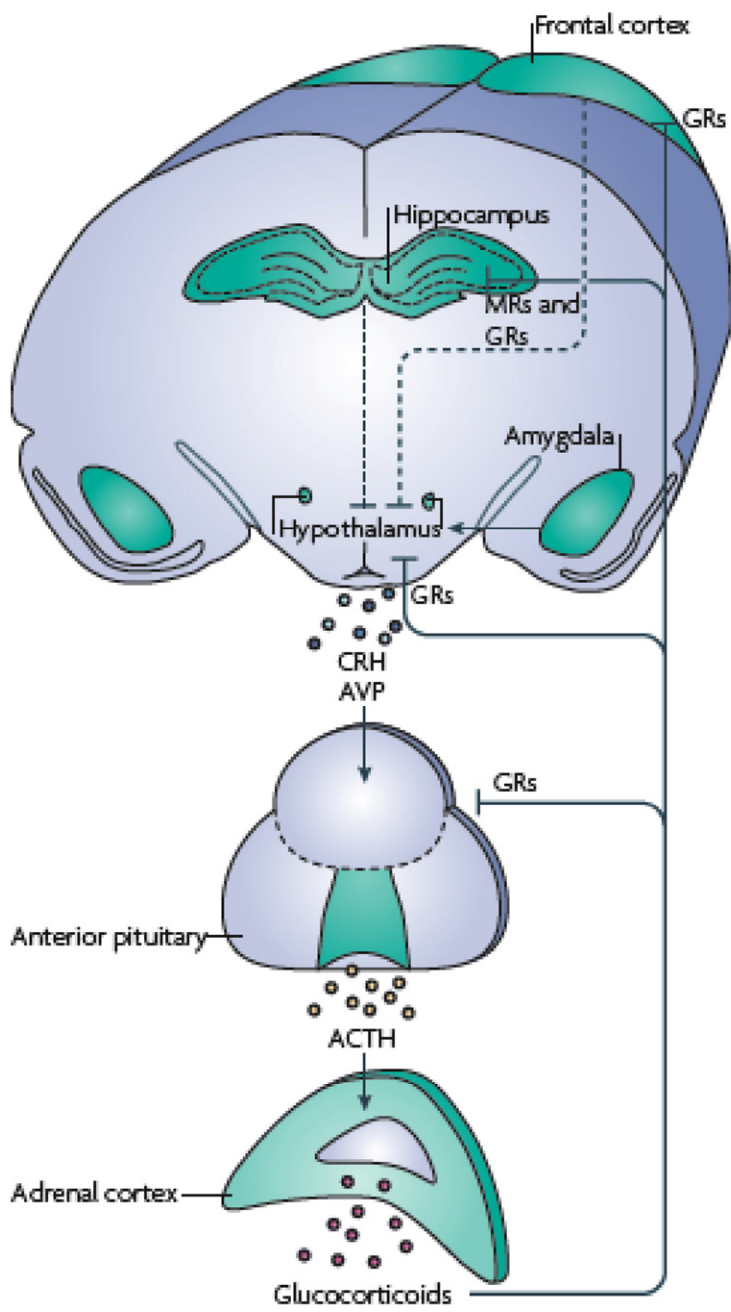

Supplement: NIHMS267103-supplement-supplement_1.pdf [file NIHMS267103-supplement-supplement_1.pdf]
